# Supplementary material for: Credence Attributes in the Forestry Sector and the Role of Environmental, Social and Governance (ESG) Factors
Source: MDPI journal article supplement (doi:10.3390/f13030432), 2022-03-09

## Planted Forest Management Across the Globe: What Do You Think?

### We Need Your Input

**Scion is conducting a study on the factors that influence the credibility of marketed products from global forests. We would like to know your views based on your experiences on the trends that you noticed over the past couple of years in lumber and wood trade. Your views are important and will help guide future decision making.**

There are no right or wrong answers to this survey. We would like to collect your honest views. Results of this survey will be summarised in a way that will provide anonymity to your identity, institution and the country that you represent. You may also opt to stop from completing this survey anytime. Please feel free to write any additional comments on the space that will be provided at the end of survey.

Please click Next to go to survey

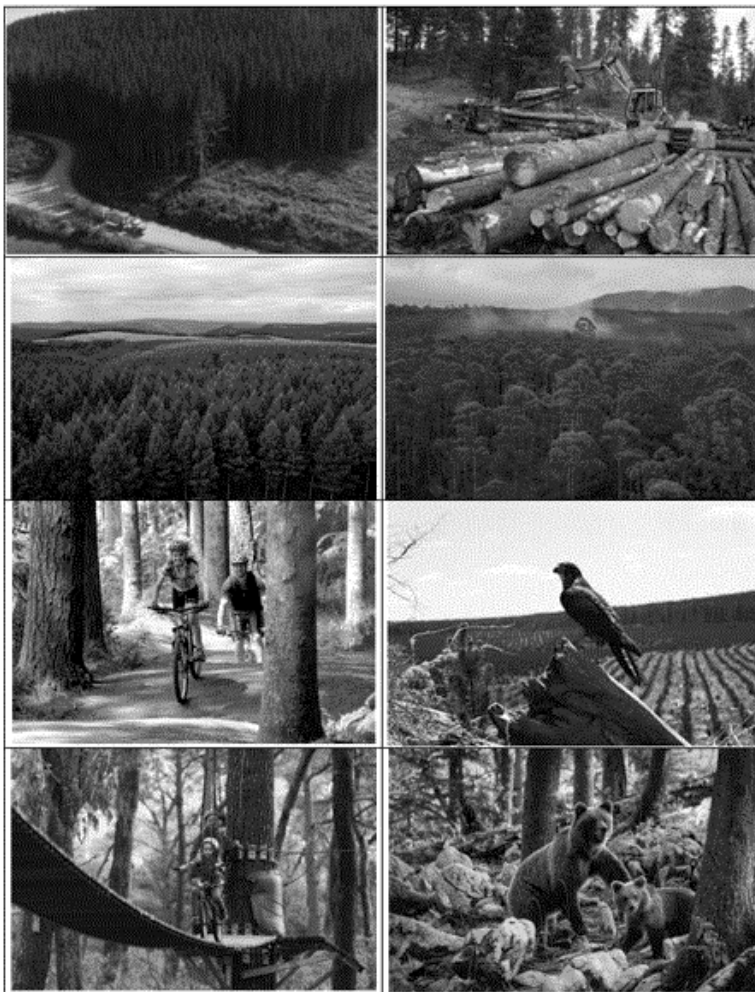

**Resilient  
Forests** Research  
Programme

**FOREST  
GROWERS  
RESEARCH**

**SCION**  
FORESTS • PRODUCTS • INNOVATION

## Planted Forest Management Across the Globe: What Do You Think?

### Section One: Impressions on timber and wood products trade

1. Which nations/regions first come to mind as being large producers of forest products? (list up to three nations/regions)

1.
2.
3.

2. Please list the most important factors you look for when considering trade in wood products with another nation (list up to five)

1.
2.
3.
4.
5.

\* 3. With the exception of New Zealand:

Please list the MAIN nation you trade with regarding forest products

\* 4. With the exception of New Zealand:

Please list the NEXT MAJOR nation you trade with regarding forest products

\* 5. With the exception of New Zealand:

Please list ANOTHER MAJOR nation you trade with regarding forest products

## Planted Forest Management Across the Globe: What Do You Think?

### Section two: Level of Awareness

This next set of questions is about your awareness of the different factors that may affect the credence (believability of attributes taken on trust) of the forest products.

Please select the appropriate level of awareness for each line in the table below. As discussed before, there is no right or wrong answers. All we want is your honest opinion. Your answers will be kept confidential and will only be used for this study.

6. Please indicate awareness of the following **international groups/initiatives/agreements**

|                                                                                          | Know well             | Have<br>seen/read<br>before | Heard from<br>someone<br>but not<br>really<br>known | Never saw             | Unsure                |
|------------------------------------------------------------------------------------------|-----------------------|-----------------------------|-----------------------------------------------------|-----------------------|-----------------------|
| Intergovernmental Panel on Climate Change (IPCC)                                         | <input type="radio"/> | <input type="radio"/>       | <input type="radio"/>                               | <input type="radio"/> | <input type="radio"/> |
| The Montréal Process Criteria and Indicators                                             | <input type="radio"/> | <input type="radio"/>       | <input type="radio"/>                               | <input type="radio"/> | <input type="radio"/> |
| Intergovernmental Science-Policy Platform on Biodiversity and Ecosystem Services (IPBES) | <input type="radio"/> | <input type="radio"/>       | <input type="radio"/>                               | <input type="radio"/> | <input type="radio"/> |
| World Business Council for Sustainable Development (WBCSD)                               | <input type="radio"/> | <input type="radio"/>       | <input type="radio"/>                               | <input type="radio"/> | <input type="radio"/> |
| The Economics of Ecosystems and Biodiversity (TEEB)                                      | <input type="radio"/> | <input type="radio"/>       | <input type="radio"/>                               | <input type="radio"/> | <input type="radio"/> |
| Convention on International Trade in Endangered Species of Wild Fauna and Flora (CITES)  | <input type="radio"/> | <input type="radio"/>       | <input type="radio"/>                               | <input type="radio"/> | <input type="radio"/> |
| Millennium Ecosystem Assessment (MEA)                                                    | <input type="radio"/> | <input type="radio"/>       | <input type="radio"/>                               | <input type="radio"/> | <input type="radio"/> |
| Global Forest & Trade Network (GFTN)                                                     | <input type="radio"/> | <input type="radio"/>       | <input type="radio"/>                               | <input type="radio"/> | <input type="radio"/> |
| Common International Classification for Ecosystem Services (CICES)                       | <input type="radio"/> | <input type="radio"/>       | <input type="radio"/>                               | <input type="radio"/> | <input type="radio"/> |

7. Please indicate awareness of the following **product certification schemes**

|                                                              | Know well             | Have seen/read<br>before | Heard from<br>someone but not<br>really known | Never saw             | Unsure                |
|--------------------------------------------------------------|-----------------------|--------------------------|-----------------------------------------------|-----------------------|-----------------------|
| Forest Stewardship Council (FSC)                             | <input type="radio"/> | <input type="radio"/>    | <input type="radio"/>                         | <input type="radio"/> | <input type="radio"/> |
| Programme for the Endorsement of Forest Certification (PEFC) | <input type="radio"/> | <input type="radio"/>    | <input type="radio"/>                         | <input type="radio"/> | <input type="radio"/> |
| China Environmental Labelling (CEL)                          | <input type="radio"/> | <input type="radio"/>    | <input type="radio"/>                         | <input type="radio"/> | <input type="radio"/> |
| Malaysian Timber Certification Council (MTCC)                | <input type="radio"/> | <input type="radio"/>    | <input type="radio"/>                         | <input type="radio"/> | <input type="radio"/> |
| Forest Certification for Ecosystem Services (ForCES)         | <input type="radio"/> | <input type="radio"/>    | <input type="radio"/>                         | <input type="radio"/> | <input type="radio"/> |
| International Tropical Timber Association (ITTO)             | <input type="radio"/> | <input type="radio"/>    | <input type="radio"/>                         | <input type="radio"/> | <input type="radio"/> |

8. Please indicate awareness of the following **methods/processes**

|                                                    | Know well             | Have seen/read<br>before | Heard from<br>someone but not<br>really aware | Never saw             | Unsure                |
|----------------------------------------------------|-----------------------|--------------------------|-----------------------------------------------|-----------------------|-----------------------|
| System of Environmental-Economic Accounting (SEEA) | <input type="radio"/> | <input type="radio"/>    | <input type="radio"/>                         | <input type="radio"/> | <input type="radio"/> |
| Biodiversity offset                                | <input type="radio"/> | <input type="radio"/>    | <input type="radio"/>                         | <input type="radio"/> | <input type="radio"/> |
| Nutrient trading scheme                            | <input type="radio"/> | <input type="radio"/>    | <input type="radio"/>                         | <input type="radio"/> | <input type="radio"/> |
| Emissions trading scheme                           | <input type="radio"/> | <input type="radio"/>    | <input type="radio"/>                         | <input type="radio"/> | <input type="radio"/> |
| Ecological footprinting                            | <input type="radio"/> | <input type="radio"/>    | <input type="radio"/>                         | <input type="radio"/> | <input type="radio"/> |
| Life Cycle Assessment (LCA)                        | <input type="radio"/> | <input type="radio"/>    | <input type="radio"/>                         | <input type="radio"/> | <input type="radio"/> |

9. Please indicate awareness of the following terms often used in corporate reporting structures

|                                                  | Know well             | Have seen/read<br>before | Heard from<br>someone but not<br>really aware | Never saw             | Unsure                |
|--------------------------------------------------|-----------------------|--------------------------|-----------------------------------------------|-----------------------|-----------------------|
| Environmental and<br>Social Governance<br>(ESGs) | <input type="radio"/> | <input type="radio"/>    | <input type="radio"/>                         | <input type="radio"/> | <input type="radio"/> |
| Corporate Social<br>Responsibility (CSR)         | <input type="radio"/> | <input type="radio"/>    | <input type="radio"/>                         | <input type="radio"/> | <input type="radio"/> |
| Social Licence to<br>Operate (SLO)               | <input type="radio"/> | <input type="radio"/>    | <input type="radio"/>                         | <input type="radio"/> | <input type="radio"/> |

## Planted Forest Management Across the Globe: What Do You Think?

### Level of consideration

The following factors may impact on the level of credence that customers attribute to producer claims about imported forest products.

**Credence Attributes** are product features that cannot be readily ascertained by consumers, but may have environmental, animal welfare, social welfare or cultural benefits. For example, in agriculture 'organic', and 'free-range' are credence attributes.

In the decision to import forest products into your country, how much consideration is given to the following factors ?

For each factor, please express the level of consideration by selecting the appropriate column.

10. How much consideration is given that **logs were harvested...**

|                                                                                                                                            | Large consideration   | Some consideration    | Slight consideration  | Not considered        | Unsure                |
|--------------------------------------------------------------------------------------------------------------------------------------------|-----------------------|-----------------------|-----------------------|-----------------------|-----------------------|
| With minimal soil disturbance                                                                                                              | <input type="radio"/> |
| With minimal impacts on the habitats of native animals (e.g., native birds)                                                                | <input type="radio"/> |
| With minimal impacts on freshwater resources                                                                                               | <input type="radio"/> |
| From a forest block/compartiment that is not in large-scale clear-cuts and rather selective, small-scale forestry (or a mosaic of forests) | <input type="radio"/> |

11. How much consideration is given that **trees were grown from...**

|                                                                                            | Large consideration   | Some consideration    | Slight consideration  | Not considered        | Unsure                |
|--------------------------------------------------------------------------------------------|-----------------------|-----------------------|-----------------------|-----------------------|-----------------------|
| A forestry area that continuously provides recreation to the community                     | <input type="radio"/> |
| A forestry area that continuously provides drinking water to the community                 | <input type="radio"/> |
| A forestry area that continuously provides habitats to native animals (e.g., native birds) | <input type="radio"/> |
| A forestry area that continuously provides flood mitigation services                       | <input type="radio"/> |
| A forestry area that continuously provides nutrient mitigation services                    | <input type="radio"/> |
| A forestry area that continuously stabilises sand dunes                                    | <input type="radio"/> |
| A mixed species forest rather than a single species monoculture plantation                 | <input type="radio"/> |

12. How much consideration is given that **trees were grown and cut...**

|                                       | Large consideration   | Some consideration    | Slight consideration  | Not considered        | Unsure                |
|---------------------------------------|-----------------------|-----------------------|-----------------------|-----------------------|-----------------------|
| With consent from local authorities   | <input type="radio"/> |
| By professional contractors           | <input type="radio"/> |
| Without the use of child labour       | <input type="radio"/> |
| Following international best practice | <input type="radio"/> |
| With limited water footprint          | <input type="radio"/> |

## Planted Forest Management Across the Globe: What Do You Think?

### Section three: Importance of Credence Attributes

**Credence Attributes** are product features that cannot be readily ascertained by consumers from inspection of the imported product.

**Producers may make claims about the wood products in terms of environmental, animal welfare, social welfare or cultural benefits.**

13. In the production of forest products that are imported by your country, which of the following claims about **how the product was grown and processed** are most important? For each claim, please express the importance by selecting the appropriate column.

|                                                                                                                                      | Very important        | Important             | Slightly important    | Not important         | Unsure                |
|--------------------------------------------------------------------------------------------------------------------------------------|-----------------------|-----------------------|-----------------------|-----------------------|-----------------------|
| <u>Place of origin/ Country of origin</u> – the source of the lumber                                                                 | <input type="radio"/> |
| <u>Pesticide free</u> – no pesticides used in nursery or forest growing cycle                                                        | <input type="radio"/> |
| <u>PEFC Certification</u> – The supplier has PEFC certification                                                                      | <input type="radio"/> |
| <u>FSC Certification</u> – The supplier has FSC certification                                                                        | <input type="radio"/> |
| <u>Natural Chemical potency</u> – nutrients/ volatiles/ active ingredients that are present in the product are of the levels claimed | <input type="radio"/> |
| <u>Added Chemical potency</u> – timber treatments present in the product are of the levels claimed                                   | <input type="radio"/> |
| <u>Job creation</u> – the number of employees associated with production of the product                                              | <input type="radio"/> |
| <u>Disease and salvage free</u> – the lumber source of the product is not from diseased or salvaged (fire/ storm) lumber             | <input type="radio"/> |



|                                                                                                          | Very important        | Important             | Slightly important    | Not important         | Unsure                |
|----------------------------------------------------------------------------------------------------------|-----------------------|-----------------------|-----------------------|-----------------------|-----------------------|
| <u>Biodiversity</u> – the forest source has a high degree of biodiversity                                | <input type="radio"/> |
| <u>Deforestation-free / Regeneration</u> – the forest source was reforested                              | <input type="radio"/> |
| <u>Community engagement</u> – community engagement in forest management decisions                        | <input type="radio"/> |
| <u>Professionalism</u> – forest products made using professional contractors                             | <input type="radio"/> |
| <u>Labour</u> – forest products made without child labour                                                | <input type="radio"/> |
| <u>Social licence</u> – level of public dissent around forest management practices or factory conditions | <input type="radio"/> |
| <u>Fibre miles</u> – the distance the product travelled to get to end market                             | <input type="radio"/> |
| <u>Packaging waste</u> – the amount of non-renewable packaging                                           | <input type="radio"/> |
| <u>Political stability</u> – the source nation has strong and stable government leadership               | <input type="radio"/> |

## Planted Forest Management Across the Globe: What Do You Think?

### Section four: Performance of Credence Attributes

**For this section, we want to know how you feel major forestry trading nations are performing regarding Credence Attributes**

14. In the production of forest products that are imported by your country, how do you feel **{{ Q3 }}** is performing around each of these attributes? For each claim, please express the performance by selecting the appropriate column.

|                                                                                                                                      | Very Good             | Good                  | Not Good              | Poor                  | Unsure                |
|--------------------------------------------------------------------------------------------------------------------------------------|-----------------------|-----------------------|-----------------------|-----------------------|-----------------------|
| <u>Place of origin/ Country of origin</u> – the source of the lumber                                                                 | <input type="radio"/> |
| <u>Pesticide free</u> – no pesticides used in nursery or forest growing cycle                                                        | <input type="radio"/> |
| <u>PEFC Certification</u> – The supplier has PEFC certification                                                                      | <input type="radio"/> |
| <u>FSC Certification</u> – The supplier has FSC certification                                                                        | <input type="radio"/> |
| <u>Natural Chemical potency</u> – nutrients/ volatiles/ active ingredients that are present in the product are of the levels claimed | <input type="radio"/> |
| <u>Added Chemical potency</u> – timber treatments present in the product are of the levels claimed                                   | <input type="radio"/> |
| <u>Job creation</u> – the number of employees associated with production of the product                                              | <input type="radio"/> |
| <u>Disease and salvage free</u> – the lumber source of the product is not from diseased or salvaged (fire/ storm) lumber             | <input type="radio"/> |

|                                                                                                          | Very Good             | Good                  | Not Good              | Poor                  | Unsure                |
|----------------------------------------------------------------------------------------------------------|-----------------------|-----------------------|-----------------------|-----------------------|-----------------------|
| <u>Biodiversity</u> – the forest source has a high degree of biodiversity                                | <input type="radio"/> |
| <u>Deforestation-free / Regeneration</u> – the forest source was reforested                              | <input type="radio"/> |
| <u>Community engagement</u> – community engagement in forest management decisions                        | <input type="radio"/> |
| <u>Professionalism</u> – forest products made using professional contractors                             | <input type="radio"/> |
| <u>Labour</u> – forest products made without child labour                                                | <input type="radio"/> |
| <u>Social licence</u> – level of public dissent around forest management practices or factory conditions | <input type="radio"/> |
| <u>Fibre miles</u> – the distance the product travelled to get to end market                             | <input type="radio"/> |
| <u>Packaging waste</u> – the amount of non-renewable packaging                                           | <input type="radio"/> |
| <u>Political stability</u> – the source nation has strong and stable government leadership               | <input type="radio"/> |

15. Think about the level of truthfulness or believability of the quality of environmental and social reporting of how planted forests were managed in **{{ Q3 }}**.

On a scale from zero to ten, where zero is lowest and ten is the highest, how would you rate truthfulness or credence in the nation's reporting process?

0

5

10

## Planted Forest Management Across the Globe: What Do You Think?

16. In the production of forest products that are imported by your country, how do you feel **{{ Q4 }}** is performing around each of these attributes? For each claim, please express the performance by selecting the appropriate column.

|                                                                                                                                      | Very Good             | Good                  | Not Good              | Poor                  | Unsure                |
|--------------------------------------------------------------------------------------------------------------------------------------|-----------------------|-----------------------|-----------------------|-----------------------|-----------------------|
| <u>Place of origin/ Country of origin</u> – the source of the lumber                                                                 | <input type="radio"/> |
| <u>Pesticide free</u> – no pesticides used in nursery or forest growing cycle                                                        | <input type="radio"/> |
| <u>PEFC Certification</u> – The supplier has PEFC certification                                                                      | <input type="radio"/> |
| <u>FSC Certification</u> – The supplier has FSC certification                                                                        | <input type="radio"/> |
| <u>Natural Chemical potency</u> – nutrients/ volatiles/ active ingredients that are present in the product are of the levels claimed | <input type="radio"/> |
| <u>Added Chemical potency</u> – timber treatments present in the product are of the levels claimed                                   | <input type="radio"/> |
| <u>Job creation</u> – the number of employees associated with production of the product                                              | <input type="radio"/> |
| <u>Disease and salvage free</u> – the lumber source of the product is not from diseased or salvaged (fire/ storm) lumber             | <input type="radio"/> |
| <u>Biodiversity</u> – the forest source has a high degree of biodiversity                                                            | <input type="radio"/> |

|                                                                                                          | Very Good             | Good                  | Not Good              | Poor                  | Unsure                |
|----------------------------------------------------------------------------------------------------------|-----------------------|-----------------------|-----------------------|-----------------------|-----------------------|
| <u>Deforestation-free / Regeneration</u> – the forest source was reforested                              | <input type="radio"/> |
| <u>Community engagement</u> – community engagement in forest management decisions                        | <input type="radio"/> |
| <u>Professionalism</u> – forest products made using professional contractors                             | <input type="radio"/> |
| <u>Labour</u> – forest products made without child labour                                                | <input type="radio"/> |
| <u>Social licence</u> – level of public dissent around forest management practices or factory conditions | <input type="radio"/> |
| <u>Fibre miles</u> – the distance the product travelled to get to end market                             | <input type="radio"/> |
| <u>Packaging waste</u> – the amount of non-renewable packaging                                           | <input type="radio"/> |
| <u>Political stability</u> – the source nation has strong and stable government leadership               | <input type="radio"/> |

17. Think about the level of truthfulness or believability of the quality of environmental and social reporting of how planted forests were managed in {{ Q4 }}.

On a scale from zero to ten, where zero is lowest and ten is the highest, how would you rate truthfulness or credence in the nation's reporting process?

0

5

10

## Planted Forest Management Across the Globe: What Do You Think?

18. In the production of forest products that are imported by your country, how do you feel **{{ Q5 }}** is performing around each of these attributes? For each claim, please express the performance by selecting the appropriate column.

|                                                                                                                                      | Very Good             | Good                  | Not Good              | Poor                  | Unsure                |
|--------------------------------------------------------------------------------------------------------------------------------------|-----------------------|-----------------------|-----------------------|-----------------------|-----------------------|
| <u>Place of origin/ Country of origin</u> – the source of the lumber                                                                 | <input type="radio"/> |
| <u>Pesticide free</u> – no pesticides used in nursery or forest growing cycle                                                        | <input type="radio"/> |
| <u>PEFC Certification</u> – The supplier has PEFC certification                                                                      | <input type="radio"/> |
| <u>FSC Certification</u> – The supplier has FSC certification                                                                        | <input type="radio"/> |
| <u>Natural Chemical potency</u> – nutrients/ volatiles/ active ingredients that are present in the product are of the levels claimed | <input type="radio"/> |
| <u>Added Chemical potency</u> – timber treatments present in the product are of the levels claimed                                   | <input type="radio"/> |
| <u>Job creation</u> – the number of employees associated with production of the product                                              | <input type="radio"/> |
| <u>Disease and salvage free</u> – the lumber source of the product is not from diseased or salvaged (fire/ storm) lumber             | <input type="radio"/> |
| <u>Biodiversity</u> – the forest source has a high degree of biodiversity                                                            | <input type="radio"/> |

|                                                                                                          | Very Good             | Good                  | Not Good              | Poor                  | Unsure                |
|----------------------------------------------------------------------------------------------------------|-----------------------|-----------------------|-----------------------|-----------------------|-----------------------|
| <u>Deforestation-free / Regeneration</u> – the forest source was reforested                              | <input type="radio"/> |
| <u>Community engagement</u> – community engagement in forest management decisions                        | <input type="radio"/> |
| <u>Professionalism</u> – forest products made using professional contractors                             | <input type="radio"/> |
| <u>Labour</u> – forest products made without child labour                                                | <input type="radio"/> |
| <u>Social licence</u> – level of public dissent around forest management practices or factory conditions | <input type="radio"/> |
| <u>Fibre miles</u> – the distance the product travelled to get to end market                             | <input type="radio"/> |
| <u>Packaging waste</u> – the amount of non-renewable packaging                                           | <input type="radio"/> |
| <u>Political stability</u> – the source nation has strong and stable government leadership               | <input type="radio"/> |

19. Think about the level of truthfulness or believability of the quality of environmental and social reporting of how planted forests were managed in {{ Q5 }}.

On a scale from zero to ten, where zero is lowest and ten is the highest, how would you rate truthfulness or credence in the nation's reporting process?

0

5

10

## Planted Forest Management Across the Globe: What Do You Think?

20. In the production of forest products that are imported by your country, how do you feel **New Zealand** is performing around each of these attributes? For each claim, please express the importance by selecting the appropriate column.

|                                                                                                                                      | Very Good             | Good                  | Not Good              | Poor                  | Unsure                |
|--------------------------------------------------------------------------------------------------------------------------------------|-----------------------|-----------------------|-----------------------|-----------------------|-----------------------|
| <u>Place of origin/ Country of origin</u> – the source of the lumber                                                                 | <input type="radio"/> |
| <u>Pesticide free</u> – no pesticides used in nursery or forest growing cycle                                                        | <input type="radio"/> |
| <u>PEFC Certification</u> – The supplier has PEFC certification                                                                      | <input type="radio"/> |
| <u>FSC Certification</u> – The supplier has FSC certification                                                                        | <input type="radio"/> |
| <u>Natural Chemical potency</u> – nutrients/ volatiles/ active ingredients that are present in the product are of the levels claimed | <input type="radio"/> |
| <u>Added Chemical potency</u> – timber treatments present in the product are of the levels claimed                                   | <input type="radio"/> |
| <u>Job creation</u> – the number of employees associated with production of the product                                              | <input type="radio"/> |
| <u>Disease and salvage free</u> – the lumber source of the product is not from diseased or salvaged (fire/ storm) lumber             | <input type="radio"/> |
| <u>Biodiversity</u> – the forest source has a high degree of biodiversity                                                            | <input type="radio"/> |



|                                                                                                          | Very Good             | Good                  | Not Good              | Poor                  | Unsure                |
|----------------------------------------------------------------------------------------------------------|-----------------------|-----------------------|-----------------------|-----------------------|-----------------------|
| <u>Deforestation-free / Regeneration</u> – the forest source was reforested                              | <input type="radio"/> |
| <u>Community engagement</u> – community engagement in forest management decisions                        | <input type="radio"/> |
| <u>Professionalism</u> – forest products made using professional contractors                             | <input type="radio"/> |
| <u>Labour</u> – forest products made without child labour                                                | <input type="radio"/> |
| <u>Social licence</u> – level of public dissent around forest management practices or factory conditions | <input type="radio"/> |
| <u>Fibre miles</u> – the distance the product travelled to get to end market                             | <input type="radio"/> |
| <u>Packaging waste</u> – the amount of non-renewable packaging                                           | <input type="radio"/> |
| <u>Political stability</u> – the source nation has strong and stable government leadership               | <input type="radio"/> |

21. Think about the level of truthfulness or believability of the quality of environmental and social reporting of how planted forests were managed in **New Zealand**.

On a scale from zero to ten, where zero is lowest and ten is the highest, how would you rate truthfulness or credence in the nation's reporting process?

0

10

22. Do you have any comments about the performance of any of these nations?



## Planted Forest Management Across the Globe: What Do You Think?

### About you

**This data will only be used for statistical purposes to classify responses by demographics, at an aggregate level, and ensure sufficient responses are sought from a variety of global perspectives.**

23. Name:

24. Position/Role:

25. Number of years in your profession:

26. Department:

27. Organisation/Institution:

28. Are you :

- ☐ Male
- ☐ Female
- ☐ Gender diverse
- ☐ Prefer not to answer

29. Which age group do you belong?

- ☐ Under 25 years old
- ☐ 25 to 34 years old
- ☐ 35 to 44 years old
- ☐ 45 to 54 years old
- ☐ 55 to 64 years old
- ☐ 65 to 74 years old
- ☐ 75 years old and above
- ☐ Prefer not to answer

30. Country of birth:

31. Which country do you currently live/work in?

32. What is your first language/mother tongue?

33. What is your highest educational attainment?

- ☐ Primary/ Elementary/ Grade School
- ☐ Secondary/High School
- ☐ Tertiary/Undergraduate/University
- ☐ Post Graduate/Masters
- ☐ PhD

Other (please specify)

## Planted Forest Management Across the Globe: What Do You Think?

34. If you have completed Tertiary/PostGrad/Masters/PhD programme, please indicate what was your major:

- ☐ Statistics
- ☐ Biology
- ☐ Forestry
- ☐ Economics
- ☐ Ecology
- ☐ Engineering

Other (please specify)

## Planted Forest Management Across the Globe: What Do You Think?

35. Have you ever worked with the forest industry before?

- ☐ Yes
- ☐ No
- ☐ Prefer not to answer

## Planted Forest Management Across the Globe: What Do You Think?

36. If Yes, how many years have you worked in the forest industry?

## Planted Forest Management Across the Globe: What Do You Think?

37. Feel free to use this space for notes, comments, etc.

Thank you for participating, your time is much appreciated!

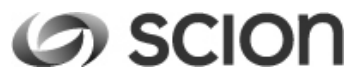

Supplement: s1 [file s1]
